# Supplementary material
Source: publisher figshare collection journal article supplement (https://tandf.figshare.com/ndownloader/files/12264332)
Supplement: Supplementary file 1 [file 12264332]

**Supplementary material**

**PREPARATIVE BIOCHEMISTRY AND BIOTECHNOLOGY**

**Efficient expression of human telomerase inhibitor 1 (hPinX1) in *Pichia pastoris***

## Fig. S1. Agarose gel electrophoresis of PCR product (M; Marker, 1:52°C, 2:53°C, 3:54°C and 4:55°C primer melting temperatures)


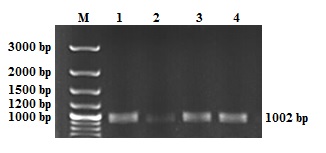


## Fig. S2. Agarose gel electrophoresis of colony PCR products with gene specific primers


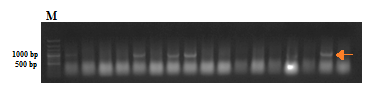


**Fig. S3.** Nucleotide BLAST analysis result of pPICZαA:hPinX1 expression cassette (sequencing with vector forward primer)


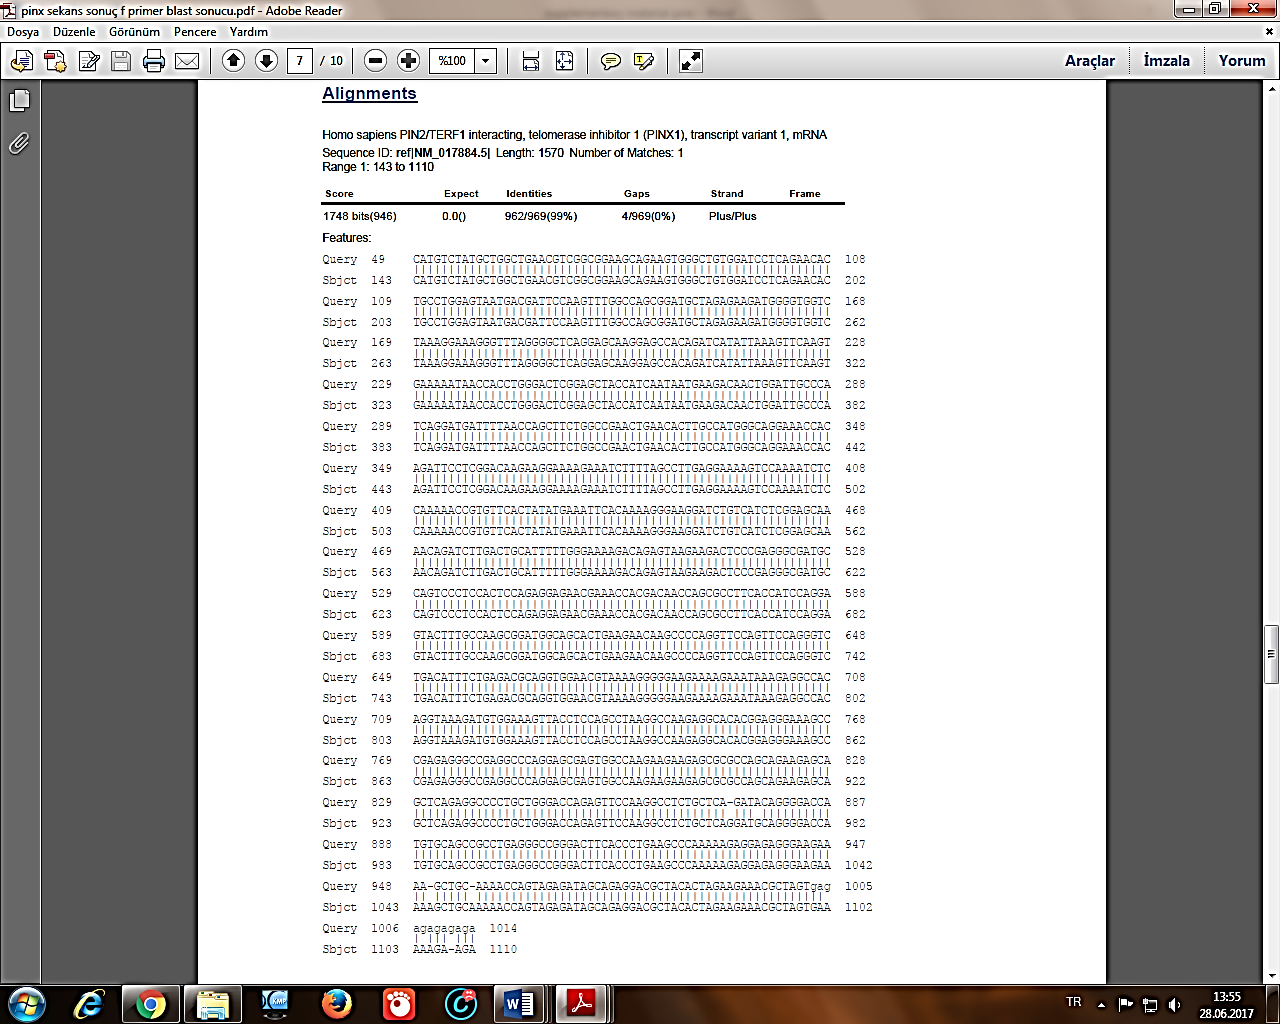


## Fig. S4. Agarose gel electrophoresis of yeast colony PCR products with gene specific primers,

**
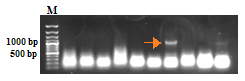
**
